# Supplementary material for: Ultramicropore-influenced mechanism of oxygen electroreduction on metal-free carbon catalysts
Source: Royal Society of Chemistry journal article supplement (doi:10.1039/c9ta10850e), 2019-01-01
Supplement: c9ta10850e1.pdf [file c9ta10850e1.pdf]

## Supporting Information

### **Ultramicropore-influenced mechanism of oxygen electroreduction on metal-free carbon catalysts**

Deicy Barrera<sup>1,2</sup>, Marc Florent<sup>1</sup>, Margarita Kulko<sup>1</sup>, Teresa J. Bandosz<sup>1</sup> \*

<sup>1</sup>Department of Chemistry and Biochemistry, The City College of New York, New York, NY 10031

<sup>2</sup>Laboratory of Porous Solids, Institute of Applied Physics (INFAP) National University of San Luis, San Luis, Argentina 5700

---

\* whom correspondence should be addressed to. Email: tbandosz@ccny.cuny.edu; Tel. (212) 650-6017

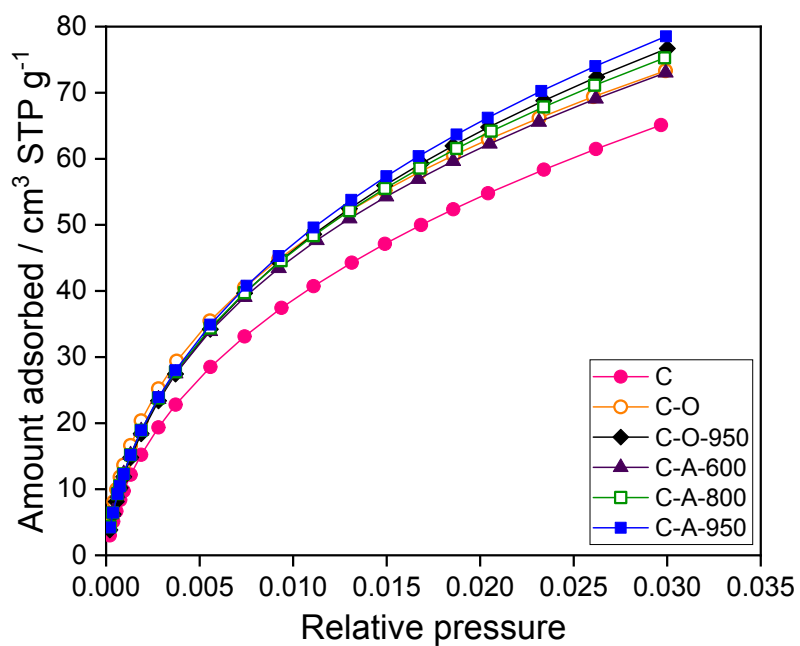

**Figure S1.** Carbon dioxide adsorption isotherms

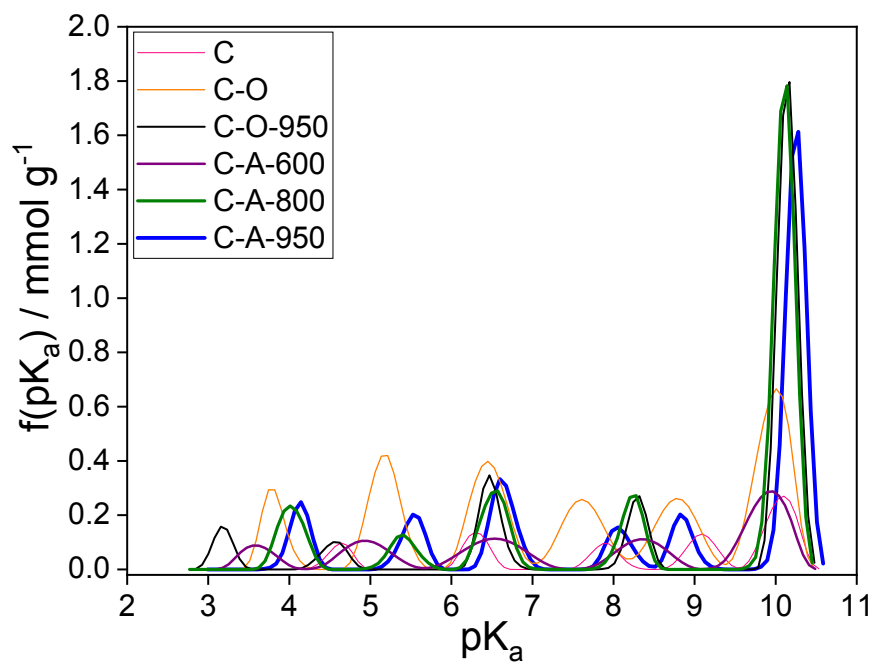

**Figure S2.**  $pK_a$  distributions.

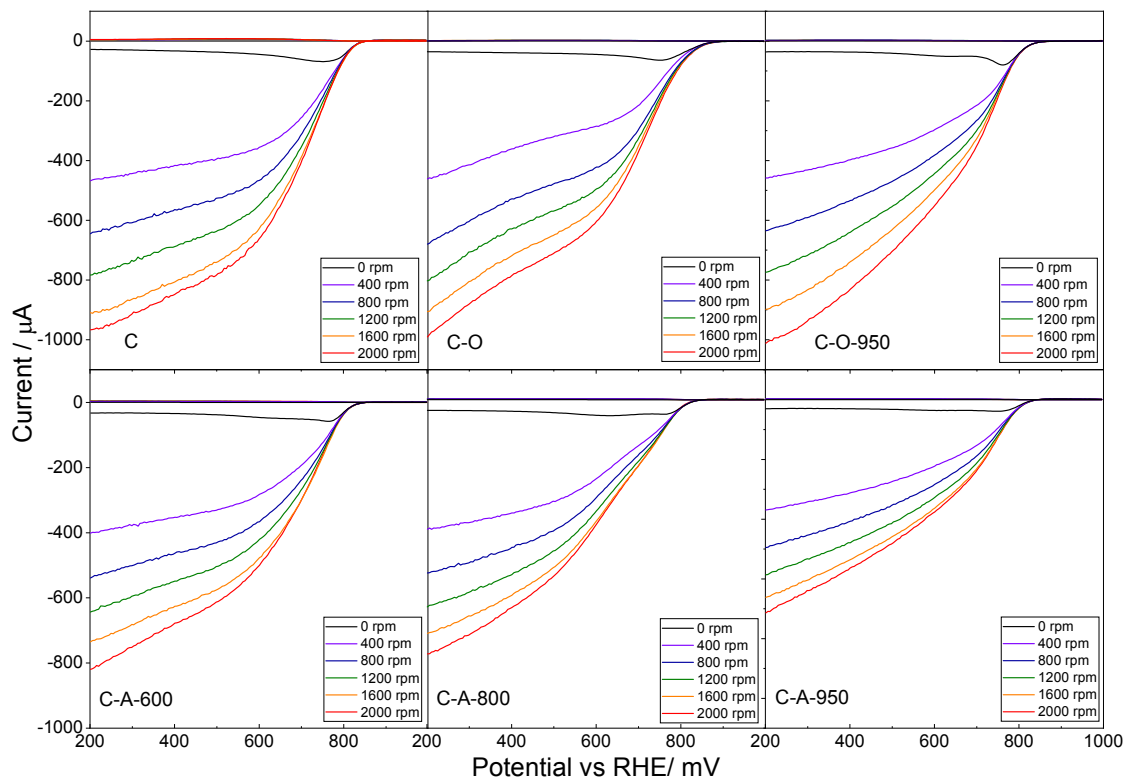

**Figure S3.** LSV curves of the modified and unmodified carbons.
